# Supplementary material for: Liver Fibrosis in Non-Alcoholic Fatty Liver Disease and Progression to Hepatocellular Carcinoma in Patients with Inflammatory Bowel Disease: A Systematic Review
Source: MDPI journal article supplement (doi:10.3390/cancers15133367), 2023-06-27
Supplement: s1 [file s1]

**Table S1.** Main characteristics of the 23 observational studies included in the systematic review

| First author, year             | Study location             | Study design                                                                                      | Sample size                                                                                      | Diagnostic method                                                 | Age (years)                                       | Gender (male) n (%)                                   | BMI (Kg/m <sup>2</sup> )                                                              | IBD type n (%)                 | Ongoing IBD therapy n (%)                                   | NAFLD prevalence n (%)                                                    | Risk factors for NAFLD                                                                                                                                                                                       | Liver fibrosis prevalence n (%)                                           | Risk factors for liver fibrosis                                                             |
|--------------------------------|----------------------------|---------------------------------------------------------------------------------------------------|--------------------------------------------------------------------------------------------------|-------------------------------------------------------------------|---------------------------------------------------|-------------------------------------------------------|---------------------------------------------------------------------------------------|--------------------------------|-------------------------------------------------------------|---------------------------------------------------------------------------|--------------------------------------------------------------------------------------------------------------------------------------------------------------------------------------------------------------|---------------------------------------------------------------------------|---------------------------------------------------------------------------------------------|
| <b>Abomhaya, 2022 [10]</b>     | Multicentric, USA          | Nationwide retrospective cohort study<br><br>Follow-up: All-cause 30 day non-elective readmission | All patients CD: 215,049.<br><br>At baseline:<br>●CD + NAFLD: 5,268<br>●CD but No-NAFLD: 209,781 | Record review of national database of discharged patients with CD | ●NAFLD : 53 (42-63)<br>●No-NAFLD: 53 (36-68)      | ●NAFLD : 2,139 (40.6)<br>●No-NAFLD: 88,737 (42.3)     | Obesity (≥30 Kg/m <sup>2</sup> ):<br>●NAFLD: 1,544 (29.3)<br>●No-NAFLD: 23,705 (11.3) | CD 215,049 (100)<br>UC 0 (0)   | NA                                                          | At baseline:<br><br>NAFLD: 2.4%<br>NASH: 0.42%                            | ●Age 45-64 years<br>●Female<br>●Metabolic syndrome<br>●Obesity<br>●Diabetes<br>●Hypertension<br>●Dyslipidemia<br>NAFLD increase hospitalization costs and length.<br>NASH increase mortality and readmission | At baseline:<br><br>Cirrhosis: 537 (10.2)                                 | NA                                                                                          |
| <b>Al-Mohannadi, 2020 [31]</b> | Unicentric, Doha, Qatar    | Retrospective cohort study<br><br>Aim: development of NAFLD during follow-up                      | IBD: 913                                                                                         | NAFLD: US LF: NAFLD fibrosis score                                | 36.9±13.2                                         | 550 (60.2)                                            | 26.9±6.1                                                                              | CD 383 (41.9)<br>UC 530 (58.1) | Biologic agents: 279 (30.6)<br>Previous surgery: 166 (18.2) | During follow-up:<br><br>NAFLD: 108 (11.8)<br>Severe steatosis: 24 (22.2) | ●Older age<br>●Higher BMI<br>●Diabetes<br>●Hypertension<br>●Anti-TNF no increase NAFLD risk                                                                                                                  | During follow-up:<br><br>LF: 19 (2.2)                                     | ROC value of 0.7 for NAFLD fibrosis score cut-off of ≥-1.67                                 |
| <b>Aggarwal, 2022 [32]</b>     | Unicentric, Cleveland, USA | Cross-sectional study<br><br>Medical records review of                                            | ●IBD + NAFLD: 50<br>●NAFLD without IBD: 959                                                      | Histology<br>●NAFLD: NASH-CRN criteria<br>●NASH: NAFLD activity   | ●IBD + NAFLD: 50.4 [39.7, 56.8]<br>●NAFLD without | ●IBD + NAFLD: 19 (38)<br>●NAFLD without IBD: 364 (38) | ●IBD + NAFLD: 32.5 [27.6, 39.7]<br>●NAFLD                                             | CD 34 (68)<br>UC 16 (32)       | NA                                                          | NASH<br>●IBD + NAFLD: 31 (62)<br>●NAFLD without IBD: 537                  | -                                                                                                                                                                                                            | Any grade of LF:<br>●IBD + NAFLD: 35 (70)<br>●NAFLD without IBD: 604 (63) | Advanced LF:<br>●CD (CD with advanced LF were older and with higher prevalence of diabetes) |

**Table S1.** Main characteristics of the 23 observational studies included in the systematic review

|                            |                             |                                                                                                          |                                                      |                                                                                                            |                                                                               |                                                                      |                                                                                                 |                                                                                                         |                                                                                                                                       |                                                                                                                                                  |                                                                      |                                                                                            |                                                                  |
|----------------------------|-----------------------------|----------------------------------------------------------------------------------------------------------|------------------------------------------------------|------------------------------------------------------------------------------------------------------------|-------------------------------------------------------------------------------|----------------------------------------------------------------------|-------------------------------------------------------------------------------------------------|---------------------------------------------------------------------------------------------------------|---------------------------------------------------------------------------------------------------------------------------------------|--------------------------------------------------------------------------------------------------------------------------------------------------|----------------------------------------------------------------------|--------------------------------------------------------------------------------------------|------------------------------------------------------------------|
|                            |                             | 1,009 patients with histologically proven NAFLD                                                          |                                                      | score 3 + any stage LF<br>●LF: Kleiner staging system (advanced LF: III-IV)                                | IBD: 50.7 [39.9,58.7]                                                         |                                                                      | without IBD: 40.2 [33.3, 47.4]                                                                  |                                                                                                         |                                                                                                                                       | (56)<br>p=0.4                                                                                                                                    |                                                                      | p=0.003<br>Advanced LF:<br>●IBD + NAFLD: 15 (30)<br>●NAFLD without IBD: 163 (17)<br>p=0.02 |                                                                  |
| <b>Bessisow, 2016 [33]</b> | Unicentric, Quebec, Canada  | Retrospective cohort study<br><br>Median follow-up 3.2 years. Aim: development of NAFLD during follow-up | IBD without NAFLD: 321                               | ●NAFLD if HSI ≥ 36<br>●Advanced LF if FIB-4 ≥ 2.67                                                         | 33.7 [25.1-46.9]                                                              | Male 151 (47)                                                        | 22.9 [20.9, 24.7]                                                                               | CD 217 (67.6)<br><br>UC 104 (32.4)                                                                      | 5-ASA 127 (39.6)<br>SE 84 (26.2)<br>AZA 67 (20.9)<br>Anti-TNF 28 (8.7)<br>MTX 14 (4.4)                                                | During follow-up: 108 (33.6)                                                                                                                     | ●Active IBD<br>●Longer IBD duration<br>●Prior surgery for IBD        | Among those who developed NAFLD during follow-up: 7 (2.2)                                  | NA                                                               |
| <b>Bosch, 2017 [34]</b>    | Unicentric, Washington, USA | Cross-sectional study<br><br>Medical records review from university database                             | ●IBD: 49<br>●IBD & PSC: 44<br>●IBD & PSC after LT:30 | Histology<br>●Steatosis: 5-33% mild, 34-67% moderate, >67% severe<br>●NASH and fibrosis: NASH-CRN criteria | ●IBD: 47 (43-51)<br>●IBD & PSC: 43 (38-47)<br>●IBD & PSC after LT: 47 (41-53) | ●IBD: 25 (51)<br>●IBD & PSC: 31 (70)<br>●IBD & PSC after LT: 23 (75) | ●IBD: 27.6 (25.1-30.2)<br>●IBD & PSC: 26.5 (24.8-28.1)<br>●IBD & PSC after LT: 25.7 (23.9-27.4) | ●IBD: CD 33 (67)<br>UC 16 (33)<br>●IBD & PSC: CD 9 (20.5)<br>UC 35 (79)<br>●IBD & PSC after LT: 23 (53) | ●IBD: SE 18 (37)<br>Anti-TNF 21 (43)<br>●IBD & PSC: SE 11 (24)<br>Anti-TNF 2 (5)<br>●IBD & PSC after LT: SE 14 (46)<br>Anti-TNF 2 (7) | NAFLD:<br>●IBD: 29 (59)<br>●IBD & PSC: 5 (11)<br>●IBD & PSC after LT: 1 (3)<br><br>NASH (% of the total patients of each group):<br>●IBD: 6 (12) | ●Age<br>●BMI<br>●Diabetes<br>●Hypertension<br>●CD<br>●Absence of PSC | Cirrhosis:<br>●IBD: 4 (8)<br>●IBD & PSC: 19 (43)<br>●IBD & PSC after LT: 5 (17)            | ●No correlation between fibrosis stage and severity of steatosis |

**Table S1.** Main characteristics of the 23 observational studies included in the systematic review

|                                               |                                           |                                                          |                                                   |                                                                                                                           |                                 |                                     |                               |                                    |                                                                                                                                                             |                                                                                                                |                                                                                                 |                                         |                                                                                                                                                                                                     |
|-----------------------------------------------|-------------------------------------------|----------------------------------------------------------|---------------------------------------------------|---------------------------------------------------------------------------------------------------------------------------|---------------------------------|-------------------------------------|-------------------------------|------------------------------------|-------------------------------------------------------------------------------------------------------------------------------------------------------------|----------------------------------------------------------------------------------------------------------------|-------------------------------------------------------------------------------------------------|-----------------------------------------|-----------------------------------------------------------------------------------------------------------------------------------------------------------------------------------------------------|
|                                               |                                           |                                                          |                                                   |                                                                                                                           |                                 |                                     |                               | CD 7<br>(23)<br>UC 23<br>(77)      |                                                                                                                                                             | ●IBD &<br>PSC: 0 (0)<br>●IBD & PSC<br>after LT: 0<br>(0)                                                       |                                                                                                 |                                         |                                                                                                                                                                                                     |
| <b>Carr,<br/>2017<br/>[35]</b>                | Multicentric, USA                         | Retrospective cohort study<br><br>Medical records review | IBD and<br>NAFLD: 84                              | ●NAFLD: 3<br>patients<br>(diagnostic<br>codes), 80<br>(radiology),<br>1<br>(histology)<br>●FL: NAFLD<br>fibrosis<br>score | 52.4±14<br>.5                   | 37<br>(44.1)                        | Obese<br>34<br>(47.9)         | CD 60<br>(71.4)<br>UC 24<br>(28.6) | NA                                                                                                                                                          | -                                                                                                              | IBD extent and<br>severity do not<br>predict NAFLD<br>severity at time<br>of NAFLD<br>diagnosis | NAFLD fibrosis<br>score -<br>2.03±0.244 | ●Metabolic<br>syndrome<br>●Taking statins<br>after NAFLD<br>diagnosis<br>(instead of prior<br>to diagnosis)<br>●No influence of<br>IBD treatments<br>●No influence of<br>IBD extent and<br>severity |
| <b>Carrillo<br/>-Palau,<br/>2021<br/>[36]</b> | Multicentric,<br>Canary Islands,<br>Spain | Cross-sectional<br>study                                 | ●IBD: 151<br>●CG: 174<br>non-diabetic<br>controls | ●NAFLD:<br>US<br>●LF: TE ><br>7.7 (>F2)                                                                                   | ●IBD:<br>48±10<br>●CG:<br>50±16 | ●IBD:<br>65 (43)<br>●CG: 56<br>(32) | ●IBD:<br>27±5<br>●CG:<br>30±3 | CD 105<br>(70)<br>UC 46<br>(30)    | 5-ASA 53<br>(35)<br>Anti-TNF<br>48 (32)<br>AZA 47 (31)<br>IFX 28 (19)<br>ADA 20<br>(13)<br>MTX 20<br>(13)<br>Ustekinum<br>ab 6 (4)<br>Vedolizum<br>ab 5 (3) | ●NAFLD in<br>IBD:<br>Mild<br>NAFLD: 40<br>(26)<br>Moderate<br>NAFLD: 19<br>(13)<br>Severe<br>NAFLD: 4<br>(2.6) | ●Higher insulin,<br>C-peptide and<br>insulin resistance<br>when NAFLD<br>grade increased        | ●IBD: 5.0±2.0<br>kPa                    | ●TE positively<br>associated with<br>insulin, C-peptide<br>serum levels,<br>insulin resistance<br>and beta-cell<br>function                                                                         |
| <b>Chen,<br/>2023</b>                         | Multicentric, UK                          | Prospective cohort study                                 | Baseline:<br>●MAFLD:                              | ●MAFLD:<br>FLI ≥ 60                                                                                                       | ●MAFLD:<br>D:                   | ●MAFLD:<br>D:                       | ●MAFLD:<br>D:                 | Incident IBD                       | NA                                                                                                                                                          | -                                                                                                              | ●MAFLD<br>increased risk of                                                                     | Incident IBD<br>during follow-          | ●MAFLD with<br>high risk of                                                                                                                                                                         |

**Table S1.** Main characteristics of the 23 observational studies included in the systematic review

|                    |                            |                                                                            |                               |                                                                                     |                                 |                                           |                                 |                                                                                                                |                                     |                                                                 |                                                                                   |                                                                                                                                                                  |                                                              |
|--------------------|----------------------------|----------------------------------------------------------------------------|-------------------------------|-------------------------------------------------------------------------------------|---------------------------------|-------------------------------------------|---------------------------------|----------------------------------------------------------------------------------------------------------------|-------------------------------------|-----------------------------------------------------------------|-----------------------------------------------------------------------------------|------------------------------------------------------------------------------------------------------------------------------------------------------------------|--------------------------------------------------------------|
| [37]               | (United Kingdom)           | UK biobank<br>Mean follow-up 12.1 years.<br>Aim: detection of incident IBD | 150,385<br>●No MAFLD: 255,028 | ●Advanced LF: BAAT ≥2                                                               | 57.4±7.8<br>●No MAFLD: 56.1±8.2 | 95,363 (63.4)<br>●No MAFLD: 88,504 (34.7) | 31.5±4.3<br>●No MAFLD: 24.9±2.8 | (cases/persons-years):<br>●MAFLD: 955/1,807,156 (CD 308, UC 647)<br>●No MAFLD: 1273/3,109,082 (CD 377, UC 896) |                                     |                                                                 | incident CD, especially colonic and ileocolonic<br>●CD with perianal disease      | up (cases/persons-years):<br>●Non-MAFLD: 1273/3,109,082<br>●MAFLD not at high risk advanced LF: 105/224,621<br>●MAFLD at high risk of advanced LF: 850/1,582,534 | advanced LF, higher risk of CD, but not UC                   |
| Kablawi, 2023 [38] | Unicentric, Quebec, Canada | Cross-sectional study                                                      | IBD: 405                      | TE<br>●NAFLD: CAP≥275 dB/m<br>●NASH with LF: FAST score<br>●Significant LF: ≥ 8 kPa | 45.1±15.3                       | 186 (45.9)                                | 25.8±5.0                        | CD 278 (68.6)<br>UC 127 (31.4)                                                                                 | Anti-TNF 146 (36)<br>5-ASA 122 (30) | NAFLD 129 (31.9)<br>NASH with LF: 11 (2.7% of IBD participants) | ●NAFLD, longer IBD duration and UC were associated with intermediate-high CV risk | 35 (8.6)                                                                                                                                                         | Significant LF was associated with intermediate-high CV risk |
| Likhitsup, 2019    | Multicentric, Kansas,      | Cross-sectional study                                                      | IBD: 80 (receiving anti-TNF)  | ●NAFLD: US<br>●NASH and                                                             | 42±15                           | 44 (55)                                   | 26±5.7                          | CD 65 (81)<br>UC 15                                                                                            | Infliximab 67 (84)<br>Adalimuma     | ●NAFLD: 43 (54)<br>●NASH                                        | ●Increased CDAI score<br>●Male sex                                                | ●LF: 7 (22)<br>●Cirrhosis: 0 (0)                                                                                                                                 | NA                                                           |

**Table S1.** Main characteristics of the 23 observational studies included in the systematic review

|                         |                              |                       |                       |                                                                                              |                                            |                                        |                                          |                                |                                                                                                                                                                                   |                                                                                          |                                                                                                |                      |                     |
|-------------------------|------------------------------|-----------------------|-----------------------|----------------------------------------------------------------------------------------------|--------------------------------------------|----------------------------------------|------------------------------------------|--------------------------------|-----------------------------------------------------------------------------------------------------------------------------------------------------------------------------------|------------------------------------------------------------------------------------------|------------------------------------------------------------------------------------------------|----------------------|---------------------|
| [39]                    | USA                          |                       |                       | LF: Fibrosure laboratory test.<br>N0=0.25 no NASH,<br>N1=0.50 probable NASH,<br>N2=0.75 NASH |                                            |                                        |                                          | (19)                           | b 10 (13)<br>Golimumab 2 (2.5)<br>Certolizumab 1 (1.3)<br>5-ASA 12 (15)<br>Thiopurines 17 (21)<br>MTX 2 (2.5)                                                                     | (N1+N2): 19 (23.8% of IBD participants , 61% of NAFLD participants with laboratory test) | ●Higher BMI                                                                                    |                      |                     |
| <b>Magri, 2019 [40]</b> | Unicentric, Monserato, Italy | Cross-sectional study | IBD: 178              | ●NAFLD: US<br>●Significant LF: TE >7 kPa                                                     | ●NAFLD : 53.9±12.9<br>●No-NAFLD: 46.9±13.5 | ●NAFLD : 51 (52)<br>●No-NAFLD: 46 (48) | ●NAFLD: 26.5±4.7<br>●No-NAFLD: 23.9±13.7 | CD: 83 (46.6)<br>UC: 95 (53.4) | ●NAFLD: SE 12 (27)<br>Immunomodulators 11 (43)<br>Biologic 28 (37)<br>Surgery 11 (31)<br>●No-NAFLD: SE 31 (73)<br>Immunomodulators 15 (53)<br>Biologic 49 (63)<br>Surgery 24 (69) | 72 (40.4)                                                                                | ●Male sex<br>●Older age<br>●Obesity<br>●Metabolic syndrome<br>●Higher caloric and lipid intake | 21 (16)              | ●Metabolic syndrome |
| <b>McHenry,</b>         | Unicentric, St.              | Cross-sectional,      | ●CD: 311<br>●CG1: 622 | NAFLD: liver                                                                                 | NA                                         | NA                                     | NA                                       | CD: 311                        | NA                                                                                                                                                                                | Absolute frequencies                                                                     | ●CD                                                                                            | Absolute frequencies | ●CD                 |

**Table S1.** Main characteristics of the 23 observational studies included in the systematic review

|                               |                                 |                                                                                                                                                                      |           |                                                                                                                                                          |                                            |                                             |                                         |                                |                                                                                                                                                      |                                                                                                                                                                                  |                                                         |                                                                                                                                                   |                                                                                                                         |
|-------------------------------|---------------------------------|----------------------------------------------------------------------------------------------------------------------------------------------------------------------|-----------|----------------------------------------------------------------------------------------------------------------------------------------------------------|--------------------------------------------|---------------------------------------------|-----------------------------------------|--------------------------------|------------------------------------------------------------------------------------------------------------------------------------------------------|----------------------------------------------------------------------------------------------------------------------------------------------------------------------------------|---------------------------------------------------------|---------------------------------------------------------------------------------------------------------------------------------------------------|-------------------------------------------------------------------------------------------------------------------------|
| <b>2019<br/>[41]</b>          | Louis,<br>USA                   | case control<br><br>CG1: internal controls, retrospective database of abdominal MR of St. Louis hospital<br><br>CG2: population-based sample from Dallas Heart Study | ●CG2: 622 | fat >5.5%<br><br>●CD and CG1: Magnetic Resonance-Proton Density Fat Fraction maps<br><br>●CG2: Magnetic Resonance Spectroscopy<br>LF: FIB-4 >1.3         |                                            |                                             |                                         | (100)<br>UC: 0<br>(0)          |                                                                                                                                                      | not reported.<br>● CD: 38%<br>●CG1: 30%<br>p=0.010<br>●CG2: 28%<br>p=0.002<br><br>Lean (BMI<25 Kg/m <sup>2</sup> ):<br>● CD: 20%<br>●CG1: 10%<br>p=0.024<br>●CG2: 10%<br>p=0.013 |                                                         | not reported.<br>●CD: 11%<br>●CG2: 5%<br>p<0.001                                                                                                  |                                                                                                                         |
| <b>Palumbo, 2018<br/>[12]</b> | Unicentric,<br>Montreal, Canada | Cross-sectional study                                                                                                                                                | CD: 384   | ●NAFLD if CAP ≥248 dB/m, severe >292 dB/m<br>●Significant LF: ≥ 7 kPa (M probe) or ≥ 6.2 kPa (XL probe). Advanced fibrosis ≥8.7 and 7.2 kPa respectively | ●NAFLD : 50.2±12.8<br>●No-NAFLD: 38.7±14.9 | ●NAFLD : 65 (51.6)<br>●No-NAFLD: 108 (41.9) | ●NAFLD: 28.2±4.9<br>●No-NAFLD: 23.5±3.7 | CD 248 (64.6)<br>UC 136 (35.4) | 5-ASA: NAFLD 43 (34.4), No-NAFLD 66 (25.6)<br>SE: NAFLD 9 (7.1), No-NAFLD 30 (11.6)<br>Thiopurines: NAFLD 23 (18.3), No-NAFLD 38 (14.7)<br>Anti-TNF: | NAFLD: 32.8%<br><br>Severe NAFLD: 19.3%                                                                                                                                          | ●Older age<br>●Higher BMI<br>●Higher triglyceride level | ●Significant LF: 12.2% of CD patients, 24.6% of CD patients with NAFLD<br><br>●Advanced LF: 8.1 % of CD patients, 18.3% of CD patients with NAFLD | ●Older age<br>●Older age at IBD diagnosis<br>●CD<br>●Higher BMI<br>●Hypertension<br>●Diabetes<br>●MTX (for advanced LF) |

**Table S1.** Main characteristics of the 23 observational studies included in the systematic review

|                             |                            |                                                                                             |                                                                        |                                                                                                                                                                                                    |                 |         |                |                                       |                                                                              |                                                                                |    |                                                                                                                                                                                                        |                                                                                                                                                                         |
|-----------------------------|----------------------------|---------------------------------------------------------------------------------------------|------------------------------------------------------------------------|----------------------------------------------------------------------------------------------------------------------------------------------------------------------------------------------------|-----------------|---------|----------------|---------------------------------------|------------------------------------------------------------------------------|--------------------------------------------------------------------------------|----|--------------------------------------------------------------------------------------------------------------------------------------------------------------------------------------------------------|-------------------------------------------------------------------------------------------------------------------------------------------------------------------------|
|                             |                            |                                                                                             |                                                                        | y                                                                                                                                                                                                  |                 |         |                |                                       | NAFLD 45 (35.7), No-NAFLD 107 (41.5)<br>MTX: NAFLD 6 (4.8), No-NAFLD 3 (1.2) |                                                                                |    |                                                                                                                                                                                                        |                                                                                                                                                                         |
| <b>Ribaldone, 2015 [43]</b> | Unicentric, Turin, Italy   | Prospective cohort study<br><br>Mean follow-up 14 years.<br>Aim: liver fibrosis development | CD: 35<br><br>Bowel surgery with contemporary liver biopsy at baseline | <ul style="list-style-type: none"> <li>●Baseline: histology</li> <li>●At the end of follow-up: TE, significant LF <math>\geq 7</math> kPa</li> </ul>                                               | 35 (15-65)      | 21 (60) | NA             | CD 35 (100)<br>UC 0 (0)               | SE 33(94.3)<br>AZA 5 (14.3)                                                  | <ul style="list-style-type: none"> <li>●Baseline, Steatosis: 9 (25)</li> </ul> | NA | <ul style="list-style-type: none"> <li>●Baseline: Fibrosis changes: 4 (11)<br/>Significant LF: 0 (0)</li> <li>●Follow-up: 5.2<math>\pm</math>1.2 kPa</li> </ul>                                        | <ul style="list-style-type: none"> <li>●AZA</li> <li>●Intermittent CD course</li> </ul>                                                                                 |
| <b>Ritacci o, 2021 [42]</b> | Unicentric, Baltimore, USA | Retrospective cohort study<br><br>5 years follow-up (n= 56)                                 | IBD and NAFLD 207 (selected from a cohort of 1,672 IBD patients)       | Medical record review<br><ul style="list-style-type: none"> <li>●NAFLD: image exams and/or histology</li> <li>●LF: NAFLD fibrosis score (-1.455-0.675 intermediate, &gt;0.675 advanced)</li> </ul> | 50.6 $\pm$ 13.6 | 96 (46) | 29.5 $\pm$ 8.0 | CD 131 (63)<br>UC 39 (19)<br>IC 9 (4) | Biologic 116 (56)<br>Immunosuppressants 106 (51)<br>5-ASA 334 (20)           | Baseline:207 (12.4)                                                            | NA | Baseline (n= 136):<br>Indeterminate 42 (31)<br>Advanced LF or cirrhosis: 6 (4)<br><br>5 years (n= 56):<br>Indeterminate: 19 (34)<br>Advanced LF or cirrhosis: 5 (9)<br>9 (16) worsened, 4 (7) improved | <ul style="list-style-type: none"> <li>●Average change in BMI in patients with LF worsening +1.3 Kg/m<sup>2</sup></li> <li>●No effect of medication exposure</li> </ul> |

**Table S1.** Main characteristics of the 23 observational studies included in the systematic review

|                                   |                                           |                                     |                                                                                                          | LF or<br>cirrhosis)                                                                                                                                                                     |                                                                                                            |                                                                                             |                                                                                                                       |                                                  |                                                                                                                                                                                                                                                         |                                                                                                                     |                                                                                                                                                                           | and 42 (77)<br>stayed stable                                                                                                    |                                                                                                                                                           |
|-----------------------------------|-------------------------------------------|-------------------------------------|----------------------------------------------------------------------------------------------------------|-----------------------------------------------------------------------------------------------------------------------------------------------------------------------------------------|------------------------------------------------------------------------------------------------------------|---------------------------------------------------------------------------------------------|-----------------------------------------------------------------------------------------------------------------------|--------------------------------------------------|---------------------------------------------------------------------------------------------------------------------------------------------------------------------------------------------------------------------------------------------------------|---------------------------------------------------------------------------------------------------------------------|---------------------------------------------------------------------------------------------------------------------------------------------------------------------------|---------------------------------------------------------------------------------------------------------------------------------|-----------------------------------------------------------------------------------------------------------------------------------------------------------|
| <b>Rodriguez-Duque, 2022 [16]</b> | Multicentric, Santander and Madrid, Spain | Cross-sectional, case control study | <ul style="list-style-type: none"> <li>●IBD: 831</li> <li>●CG: 1,718 (ETHON cohort)</li> </ul>           | TE <ul style="list-style-type: none"> <li>●Steatosis: CAP &gt; 248 dB/m</li> <li>●Significant LF: <math>\geq 7.2</math> kPa</li> <li>●Advanced LF: <math>\geq 9.7</math> kPa</li> </ul> | <ul style="list-style-type: none"> <li>●IBD: 52 (19-76)</li> <li>●CG: 51 (20-79)</li> </ul>                | <ul style="list-style-type: none"> <li>●IBD: 401 (48.3)</li> <li>●CG: 832 (48.4)</li> </ul> | <ul style="list-style-type: none"> <li>●IBD: 26.2<math>\pm</math>4.9</li> <li>●CG: 26.3<math>\pm</math>4.8</li> </ul> | CD: 389 (46.8)<br>UC: 420 (50.5)<br>IC: 22 (2.7) | Current SE: 25 (3)<br>Previous SE: 567 (68.2)<br>Current biologic: 144 (17.3)<br>Previous biologic: 207 (24.9)<br>Current AZA: 147 (17.7)<br>Previous AZA: 348 (41.9)<br>Current MTX: 1 (0.1)<br>Previous MTX: 19 (2.3)<br>Previous surgery: 178 (21.4) | MAFLD <ul style="list-style-type: none"> <li>●IBD: 349 (42.0)</li> <li>●CG: 563 (32.8)</li> </ul> <p>p&lt;0.001</p> | MAFLD <ul style="list-style-type: none"> <li>●IBD</li> <li>●IBD complications</li> <li>●High BMI</li> <li>●Older age</li> <li>●Male sex</li> <li>●Dyslipidemia</li> </ul> | Advanced LF in patients with MAFLD: (n=349)<br>●IBD: 33 (9.5)<br>(n=563)<br>●CG: 13 (2.3)<br><br>p<0.001                        | <ul style="list-style-type: none"> <li>●IBD</li> <li>●Crohn's Disease</li> <li>●IBD complications</li> <li>●High BMI</li> <li>●Type 2 Diabetes</li> </ul> |
| <b>Sartini, 2018 [44]</b>         | Unicentric, Modena, Italy                 | Retrospective, case-control study   | <ul style="list-style-type: none"> <li>●NAFLD + IBD: 78</li> <li>●CG (NAFLD without IBD): 145</li> </ul> | NAFLD: US review<br>TE review (cut off not                                                                                                                                              | <ul style="list-style-type: none"> <li>●NAFLD + IBD: 51.2<math>\pm</math>11.8</li> <li>●CG: 54.</li> </ul> | <ul style="list-style-type: none"> <li>●NAFLD + IBD: 49 (62.8)</li> <li>●CG: 43</li> </ul>  | <ul style="list-style-type: none"> <li>●NAFLD + IBD: 28.6<math>\pm</math>4.8</li> </ul>                               | CD 42 (53.8)<br>UC 36 (46.2)                     | 5-ASA: 51 (65.4)<br>SE: 3 (3.8)<br>SE + 5-ASA: 4 (5.1)                                                                                                                                                                                                  | -                                                                                                                   | NAFLD in IBD: <ul style="list-style-type: none"> <li>●Younger</li> <li>●Lower BMI</li> <li>●Less often hypertension, ↓</li> </ul>                                         | TE: <ul style="list-style-type: none"> <li>●NAFLD + IBD: 5.2<math>\pm</math>1.7</li> <li>●CG: 6.4<math>\pm</math>3.5</li> </ul> | NA                                                                                                                                                        |



**Table S1.** Main characteristics of the 23 observational studies included in the systematic review

|                             |                              |                                                                                                                                                      |         |                                                                                                      |        |            |               |                          |                                                                                    |                                                                                                                                                                         |                                                                                                  |                                                                                                                                      |                                                                                        |
|-----------------------------|------------------------------|------------------------------------------------------------------------------------------------------------------------------------------------------|---------|------------------------------------------------------------------------------------------------------|--------|------------|---------------|--------------------------|------------------------------------------------------------------------------------|-------------------------------------------------------------------------------------------------------------------------------------------------------------------------|--------------------------------------------------------------------------------------------------|--------------------------------------------------------------------------------------------------------------------------------------|----------------------------------------------------------------------------------------|
|                             |                              |                                                                                                                                                      |         | specified) and APRI                                                                                  | 9±12.5 | (29.7)     | ●CG: 30.2±5.4 |                          | Thiopurine s: 4 (5.1)<br>Anti-TNF: 15 (19.2)<br>Surgery: 27 (34.6)                 |                                                                                                                                                                         | HDL, ↑ fasting glucose and metabolic syndrome<br>●Severe IBD is associated with severe steatosis | APRI:<br>●NAFLD + IBD: 0.46±0.34<br>●CG: 0.63±0.52                                                                                   |                                                                                        |
| <b>Simon, 2018 [11]</b>     | Unicentric, Boston, USA      | Cross-sectional study                                                                                                                                | CD: 462 | NAFLD: CT LF: FIB-4 (advanced >1.45)                                                                 | 40±15  | 216 (46.7) | 25.4±5.0      | CD 462 (100)<br>UC 0 (0) | NA                                                                                 | 242 (52)                                                                                                                                                                | ●Age<br>●Diabetes<br>●PNPLA3 genotype                                                            | Advanced LF: 32 (13.2% of patients with CD and NAFLD)                                                                                | ●IRGM rs13361189 CT/CC genotype<br>●IRGM rs4958847 AG/AA genotype                      |
| <b>Spagnuolo, 2019 [45]</b> | Unicentric, Catanzaro, Italy | Retrospective cohort study<br>Mean follow-up 4 years.<br>Aim: changes of steatosis severity and LF in patients who gained, lost or maintained weight | IBD: 89 | Medical record review<br>TE at baseline and during follow-up<br>●NAFLD: CAP >216 dB/m<br>●LF: >7 kPa | 44±13  | 56 (63)    | 25±3          | CD 29 (33)<br>UC 60 (67) | 5-ASA 83 (93)<br>Anti-TNF 16 (18)<br>Thiopurine s 16 (18)<br>SE 5 (6)<br>MTX 1 (1) | Baseline: Liver steatosis: (66)<br>Severe steatosis: (15)<br><br>Mean difference of CAP after follow-up:<br>●↓ weight: -53±21<br>●≈ weight: -2.1±18<br>●↑ weight: 51±36 | Weight gain is predictor of steatosis worsening                                                  | Baseline: LS 4.7±1 kPa<br><br>Mean difference of LS after follow-up:<br>●↓ weight: -0.15±1<br>●≈ weight: 0.21±1<br>●↑ weight: 0.76±2 | Significantly lower LS in patients who lost weight compared to those who gained weight |
| <b>Trifan,</b>              | Unicentric                   | Cross-                                                                                                                                               | IBD: 82 | TE                                                                                                   | 49±13  | 45         | 25.3±4.       | CD 37                    | 5-ASA 43                                                                           | 38 (46.3)                                                                                                                                                               | ●Older age                                                                                       | 21 (25.7)                                                                                                                            | ●Older age                                                                             |

**Table S1.** Main characteristics of the 23 observational studies included in the systematic review

|                              |                                     |                                                                                                |                                                                                                      |                                                                                                                                                        |                 |           |                   |                           |                                                                      |                                                                                                               |                                                                                                                                                                                                                                        |                                                                                                                   |                                                                                                                                                             |
|------------------------------|-------------------------------------|------------------------------------------------------------------------------------------------|------------------------------------------------------------------------------------------------------|--------------------------------------------------------------------------------------------------------------------------------------------------------|-----------------|-----------|-------------------|---------------------------|----------------------------------------------------------------------|---------------------------------------------------------------------------------------------------------------|----------------------------------------------------------------------------------------------------------------------------------------------------------------------------------------------------------------------------------------|-------------------------------------------------------------------------------------------------------------------|-------------------------------------------------------------------------------------------------------------------------------------------------------------|
| <b>2022 [46]</b>             | ic, Iasi, Romania                   | sectional study                                                                                | <ul style="list-style-type: none"> <li>● IBD + NAFLD: 38</li> <li>● IBD without NAFLD: 44</li> </ul> | <ul style="list-style-type: none"> <li>● NAFLD: CAP <math>\geq</math> 248 dB/m</li> <li>● Significant LF: <math>\geq</math> 7.2 kPa</li> </ul>         |                 | (54.8)    | 7                 | (45.1) UC 45 (54.9)       | (52.5) Biologic 24 (29.3) AZA 9 (10.9) SE 6 (7.3)                    |                                                                                                               | <ul style="list-style-type: none"> <li>● BMI</li> <li>● Longer IBD duration</li> <li>● Age at diagnosis</li> <li>● Bowel resection</li> <li>● C-reactive protein</li> <li>● Triglycerides</li> <li>● Fasting plasma glucose</li> </ul> | <ul style="list-style-type: none"> <li>● IBD + NAFLD: 14 (36.9)</li> <li>● IBD without NAFLD: 7 (15.9)</li> </ul> | <ul style="list-style-type: none"> <li>● Higher BMI</li> <li>● IBD duration</li> </ul>                                                                      |
| <b>Van Lingen, 2021 [47]</b> | Unicentric, Leiden, The Netherlands | Prospective cohort study<br><br>Follow-up 6-12 months. Aim NAFLD and liver fibrosis prevalence | IBD: 82                                                                                              | TE <ul style="list-style-type: none"> <li>● Steatosis: CAP <math>\geq</math> 248 dB/m</li> <li>● Significant LF: <math>\geq</math> 7.3 kPa</li> </ul>  | 42.7 $\pm$ 16.0 | 46 (56.1) | 25.1 $\pm$ 4.7    | CD 40 (48.8) UC 42 (51.2) | Previous surgery: 26 (32.1)                                          | <ul style="list-style-type: none"> <li>● Baseline: 32 (39.5)</li> <li>● After follow-up: 29 (35.8)</li> </ul> | <ul style="list-style-type: none"> <li>● Increased waist circumference</li> <li>● Increased CAP during follow-up if IBD activity</li> </ul>                                                                                            | <ul style="list-style-type: none"> <li>● Baseline: 16 (19.8)</li> <li>● After follow-up: 10 (12.3)</li> </ul>     | <ul style="list-style-type: none"> <li>● Increased LF during follow-up if IBD activity</li> <li>● No other IBD related or metabolic risk factors</li> </ul> |
| <b>Veltkamp, 2022 [48]</b>   | Unicentric, Heidelberg, Germany     | Cross-sectional study                                                                          | IBD: 132                                                                                             | US and TE <ul style="list-style-type: none"> <li>● NAFLD: US and CAP <math>\geq</math> 248 dB/m</li> <li>● LF: <math>\geq</math> 7 kPa</li> </ul>      | 42 [31,57]      | 57 (43)   | 23 [20,26]        | CD 79 (60) UC 53 (40)     | SE 112 (88) Thiopurines 39 (31) Anti-TNF 26 (20) MTX 7 (6)           | 40 (30.3)                                                                                                     | <ul style="list-style-type: none"> <li>● Older age</li> <li>● Higher BMI</li> <li>● Longer IBD duration</li> <li>● AST and GGT levels</li> </ul>                                                                                       | 11 (8)<br>7 of them had liver steatosis                                                                           | <ul style="list-style-type: none"> <li>● Longer IBD duration</li> <li>● CD</li> </ul>                                                                       |
| <b>Yen, 2021 [49]</b>        | Changhua, Taiwan                    | Retrospective cohort study                                                                     | IBD: 81                                                                                              | US and TE <ul style="list-style-type: none"> <li>● NAFLD: CAP <math>\geq</math> 248 dB/m</li> <li>● Significant LF: <math>&gt;</math> 8 kPa</li> </ul> | 43.5 $\pm$ 14.4 | 58 (71.6) | 22.4 [20.3, 25.6] | CD 36 (44.4) UC 45 (55.6) | Anti-TNF 29 (35.8) Anti-integrin 6 (7.4) Previous surgery: 19 (23.5) | 24 (29.6)                                                                                                     | <ul style="list-style-type: none"> <li>● Higher BMI</li> <li>● Older age at diagnosis</li> <li>● Shorter IBD duration</li> </ul>                                                                                                       | 4 (4.9)                                                                                                           | NA                                                                                                                                                          |

**Table S1.** Main characteristics of the 23 observational studies included in the systematic review

5-ASA: 5-Aminosalicylic acid. ADA: Adalimumab. APRI: AST to Platelet Ratio Index. AZA: Azathioprine. BAAT score: BMI, age, ALT, Triglycerides. CD: Crohn’s Disease. CDAI: Crohn’s Disease Activity Index. CT: Computed Tomography. CV: Cardiovascular. ETHON: Epidemiological sTudy of Hepatic infectiONs (Spanish Hepatitis C Prevalence Study). FAST score: Fibroscan-Aspartate Aminotransferase Score. FIB-4: Fibrosis 4 Index. HSI: Hepatic Steatosis Index. IBD: Inflammatory Bowel Disease. IC: Indeterminate Colitis. IFX: Infliximab. LF: Liver Fibrosis. LS: Liver Stiffness. MRI: Magnetic Resonance Imaging. MTX: Methotrexate. NA: Not Available. NAFLD: Non-Alcoholic Fatty Liver Disease. NASH-CRN: Non Alcoholic Steatohepatitis Clinical Research Network. TE: Transient Elastografy. UC: Ulcerative Colitis. LF: Liver Fibrosis. SE: Systemic Steroids. US: Abdominal Ultrasound. USA: United States of America. Continuous data are presented as mean  $\pm$  Standard Deviation (SD), median (range) or median [Interquartile Range].
